# Supplementary material for: Clinical and MRI efficacy of sc IFN β-1a tiw in patients with relapsing MS appearing to transition to secondary progressive MS: post hoc analyses of PRISMS and SPECTRIMS
Source: PubMed Central journal article supplement (PMC6954891; doi:10.1007/s00415-019-09532-5), 2019-09-26

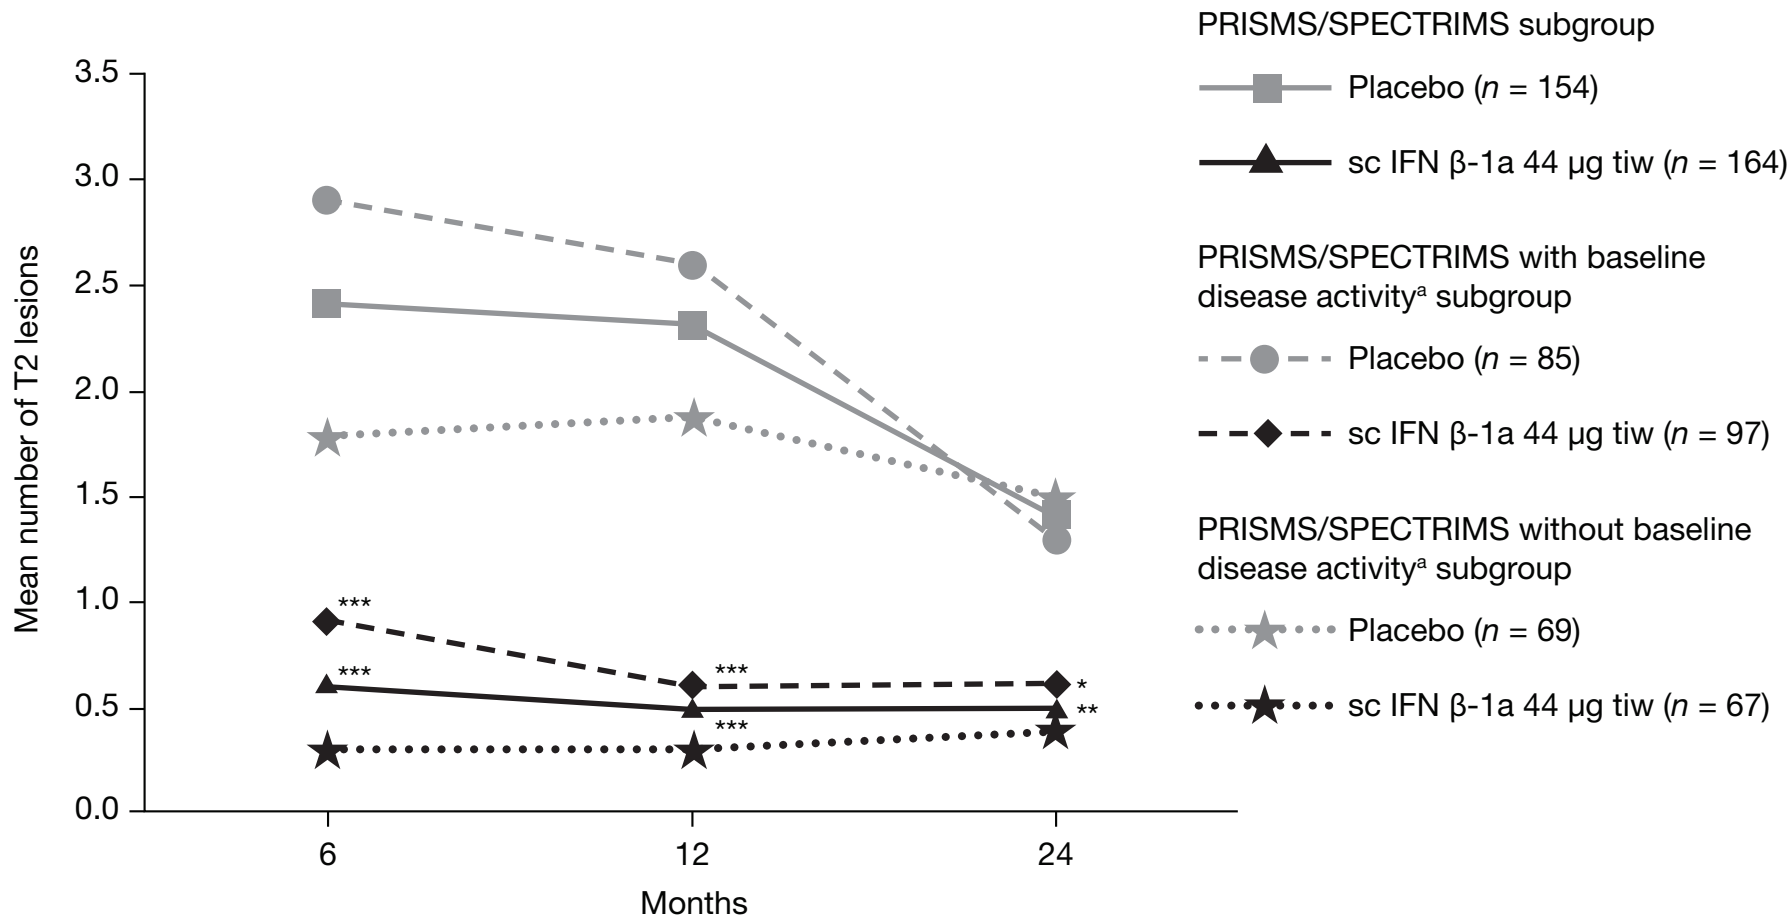

Supplement: 415_2019_9532_MOESM1_ESM.pdf [file 415_2019_9532_MOESM1_ESM.pdf]
